# Supplementary material for: The role of dysregulated ghrelin/LEAP-2 balance in anorexia nervosa
Source: PubMed Central journal article supplement (PMC10587521; doi:10.1016/j.isci.2023.107996), 2023-09-22
Supplement: mmc1.pdf [file mmc1.pdf]

**iScience, Volume 26**

**Supplemental information**

**The role of dysregulated ghrelin/LEAP-2**

**balance in anorexia nervosa**

**Chloé Tezenas du Montcel, Philibert Duriez, Jingxian Cao, Nicolas Lebrun, Nicolas Ramoz, Odile Viltart, Philip Gorwood, and Virginie Tolle**

## SUPPLEMENTAL INFORMATION

| Figure                                           | ANOVA     | Mice per group | Factors             | F <sub>(DFn,DFd)</sub>         | p-value |
|--------------------------------------------------|-----------|----------------|---------------------|--------------------------------|---------|
| <b>Body Weight (g)</b>                           | Three-way | AL/ALW n=8     | Time ****           | F <sub>(16,448)</sub> = 70,930 | p<0,001 |
| Figure 1A                                        |           | FR/FRW n=8     | FR ****             | F <sub>(1,28)</sub> = 73,060   | p<0,001 |
|                                                  |           |                | Running             | F <sub>(1,28)</sub> =0,580     | p=0,452 |
|                                                  |           |                | Time x FR ****      | F <sub>(16,448)</sub> =79,200  | p<0,001 |
|                                                  |           |                | Time x Running **   | F <sub>(16,448)</sub> =2,539   | P<0,001 |
|                                                  |           |                | FR x Running        | F <sub>(1,28)</sub> =2,059     | p=0,162 |
|                                                  |           |                | Time x FR x Running | F <sub>(16,448)</sub> = 1,649  | p=0,053 |
| <b>AG in food restriction (pmol/L)</b>           | Two-way   | AL/ALW n=8     | Running             | F <sub>(1,28)</sub> =0,386     | p=0,539 |
| Figure 1B                                        |           | FR/FRW n=8     | FR ****             | F <sub>(1,28)</sub> =40,630    | p<0,001 |
|                                                  |           |                | FR x Running        | F <sub>(1,28)</sub> =0,009     | p=0,755 |
| <b>LEAP-2 in food restriction (pmol/L)</b>       | Two-way   | AL/ALW n=8     | Running             | F <sub>(1,28)</sub> =0,025     | p=0,874 |
| Figure 1C                                        |           | FR/FRW n=8     | FR ****             | F <sub>(1,28)</sub> =11,020    | p=0,002 |
|                                                  |           |                | FR x Running        | F <sub>(1,28)</sub> =0,011     | p=0,917 |
| <b>AG/LEAP-2 molar ratio in food restriction</b> | Two-way   | AL/ALW n=8     | Running             | F <sub>(1,28)</sub> =0,559     | p=0,461 |
| Figure 1D                                        |           | FR/FRW n=8     | FR ****             | F <sub>(1,28)</sub> =30,490    | p<0,001 |
|                                                  |           |                | FR x Running        | F <sub>(1,28)</sub> =0,651     | p=0,426 |
| <b>AG in refeed mice (pmol/L)</b>                | RM        | FR n=8         | Refeeding ****      | F <sub>(1,13)</sub> =26,370    | p<0,001 |
| Figure 1E                                        |           | FRW n=7        | Running             | F <sub>(1,13)</sub> =1,310     | p=0,272 |
|                                                  |           |                | Refeeding x Running | F <sub>(1,13)</sub> =0,007     | p=0,936 |
| <b>LEAP-2 in refeed mice (pmol/L)</b>            | RM        | FR n=8         | Refeeding ****      | F <sub>(1,14)</sub> =17,630    | p<0,001 |
| Figure 1F                                        |           | FRW n=8        | Running             | F <sub>(1,14)</sub> =0,377     | p=0,055 |
|                                                  |           |                | Refeeding x Running | F <sub>(1,14)</sub> =1,458     | p=0,247 |
| <b>AG/LEAP-2 molar ratio in refeed mice</b>      | RM        | FR n=8         | Refeeding ****      | F <sub>(1,13)</sub> =20,530    | p<0,001 |
| Figure 1G                                        |           | FRW n=8        | Running             | F <sub>(1,13)</sub> =0,193     | p=0,668 |
|                                                  |           |                | Refeeding x Running | F <sub>(1,13)</sub> =1,041     | p=0,326 |

**Table S1. ANOVA table of preclinical data, related to Figure 1. Data represent mean±SEM and were analyzed using three-way ANOVA (A), two-way ANOVA (B-D) or RM ANOVA (E-G).**

\*\*\*  $p < 0.001$ , \*\*\*\*  $p < 0.0001$ . AG: Acyl-ghrelin. LEAP-2: Liver-expressing Antimicrobial Peptide-2.

|                                  | V1 (n=30)    | V2 (n=30)    | Paired Student t-test |
|----------------------------------|--------------|--------------|-----------------------|
| Age (years)                      | 27,00±1,68   | -            |                       |
| Duration of illness (months)     | 92,27±17,70  | -            |                       |
| Days before inclusion            | 4,43±0,44    | -            |                       |
| Subtype                          |              |              |                       |
| AN-R                             | 77,0% (n=23) | -            |                       |
| AN-BP                            | 23,3% (n=7)  | -            |                       |
| BMI (kg/m <sup>2</sup> ) ****    | 14,22±0,24   | 20,11±0,09   | t=26,6 df=29 p<0,0001 |
| EDI-2 ****                       | 90,64±9,00   | 62,94±7,73   | t=5,21 df=29 p<0,0001 |
| EAI **                           | 25,61±2,36   | 21,51±2,04   | t=2,90 df=29 p<0,01   |
| Weekly Leisure Activity (hour) * | 44,94±5,99   | 30,76±3,19   | t=2,56 df=29 p=0,01   |
| AG (pmol/L) ****                 | 36,22±5,36   | 20,79±3,88   | t=5,47 df=29 p<0,0001 |
| LEAP-2 (pmol/L) *                | 3830±390,60  | 3095±303,60  | t=2,06 df=29 p<0,05   |
| AG/LEAP-2 molar ratio**          | 0,01±0,0001  | 0,007±0,0009 | t=3,07 df=29 p<0,01   |

**Table S2. Epidemiological, clinical, and biological data of 30 patients in the longitudinal follow-up study, related to Figure 3.** Data represent mean±SEM and were analyzed using paired t-test: \*p<0.05, \*\*p<0.01, \*\*\*\*p<0.0001. AN-R: Anorexia Nervosa Restrictive subtype, AN-BP: Anorexia Nervosa, Binge Purge subtype. BMI: Body Mass Index. EDI-2: Eating Disorder Inventory-2, EAI: Exercise Addiction Index. AG: Acyl-ghrelin, LEAP-2: Liver Expressing Antimicrobial Peptide-2.

|                                            |                              | <b>Stable remission</b> | <b>Unstable Remission</b> | <b>Student or Mann-Whitney test</b> |
|--------------------------------------------|------------------------------|-------------------------|---------------------------|-------------------------------------|
| <b>N</b>                                   |                              | 12                      | 17                        |                                     |
| <b>Age (years)</b>                         |                              | 25.58±1.63              | 28,00±2,76                | p=0,879                             |
| <b>Duration of illness (months)</b>        |                              | 96,67±27,62             | 94,35±24,83               | p=0,939                             |
| <b>BMI (kg/m2)</b>                         | V1                           | 14,66±0,35              | 13.9±0.33                 | p=0,140                             |
|                                            | V2*                          | 20,25±0,09              | 20.01±0.15                | p=0,043                             |
|                                            | V3****                       | 20.07±0.44              | 16.58±0.35                | p<0,001                             |
| <b>Weight gain (% initial body weight)</b> |                              | 39.23±4.21              | 45.08±2.51                | p=0,27                              |
| <b>EDI-2</b>                               | V1                           | 111.1±15.25             | 81.1±12.13                | p=0,136                             |
|                                            | V2                           | 77.67±14.69             | 57.00±10.23               | p=0,234                             |
|                                            | V3                           | 80.33±15.97             | 38.60±15.63               | p=0,053                             |
| <b>EAI</b>                                 | V1                           | 30.83±4.88              | 21.06±2.58                | p=0,085                             |
|                                            | V2                           | 23.88±4.78              | 19.93±2.07                | p=0,70                              |
|                                            | V3                           | 22.83±3.00              | 13.55±3.01                | p=0,061                             |
| <b>AG (pmol/L)</b>                         | V1                           | 31.99±7.88              | 39.96±7.71                | p=0,444                             |
|                                            | V2                           | 19.05±6.47              | 22.09±5.17                | p=0,491                             |
|                                            | V1 versus V2 in stable **    |                         |                           | p=0,009                             |
|                                            | V1 versus V2 in unstable *** |                         |                           | p<0,001                             |
| <b>LEAP-2 (pmol/L)</b>                     | V1                           | 3469±672.3              | 4202±490.1                | p=0,131                             |
|                                            | V2                           | 3291±506.1              | 3021±405.1                | p=0,678                             |
|                                            | V1 versus V2 in stable       |                         |                           | p=0,640                             |
|                                            | V1 versus V2 in unstable *   |                         |                           | p=0,044                             |
| <b>AG/LEAP-2 molar ratio</b>               | V1                           | 0.011±0.003             | 0.011±0.002               | p=0,913                             |
|                                            | V2                           | 0.006±0.001             | 0.008±0.001               | p=0,394                             |
|                                            | V1 versus V2 in stable *     |                         |                           | p=0,043                             |
|                                            | V1 versus V2 in unstable     |                         |                           | p=0,078                             |

**Table S3. Epidemiological, clinical and biological data on patients evaluated 6 months after discharge, related to Figure 4. Patients were characterized with either stable remission**

(n=12) if BMI $\geq$ 18,5 or unstable remission (n=17) if BMI<18,5. Data represent mean $\pm$ SEM and were analyzed using Student t-test or non-parametric Mann Whitney test depending on data distribution. \*p<0.05, \*\*p<0.01, \*\*\* p<0.001, \*\*\*\* p<0,0001. BMI: Body mass Index (kg/m<sup>2</sup>), AG: Acyl-ghrelin. LEAP-2: Liver-expressing Antimicrobial Peptide-2. V1: undernourished state at admission; V2: refed state at discharge.

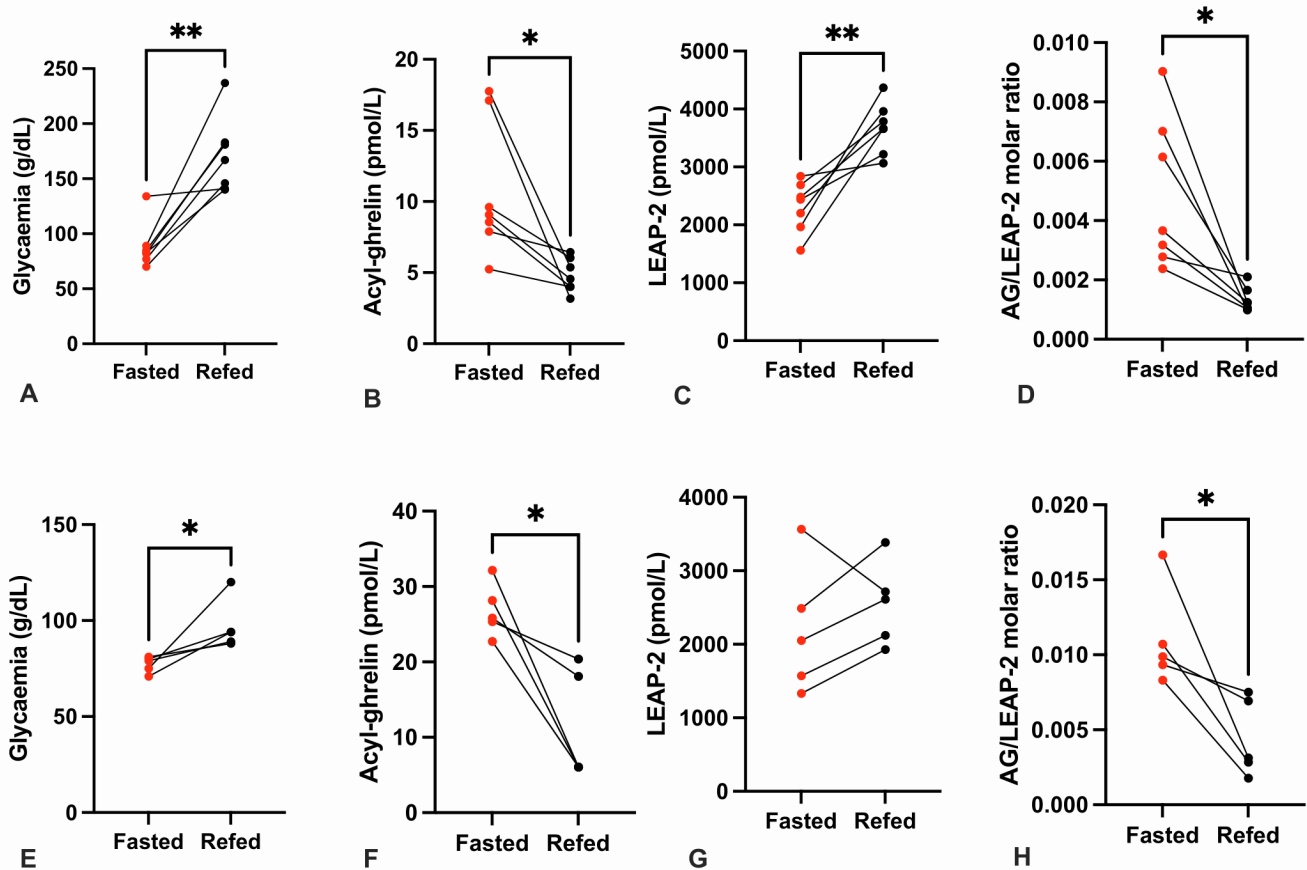

**Figure S1. Longitudinal changes in plasma AG and LEAP-2 levels during acute fasting and refeeding in eight-week-old female mice (A-D) and in healthy women (E-H), related to the STAR Methods.** Acute 48h fasting in female significantly decreased blood glucose levels (A) that was restored after 48h *ad libitum* refeeding. Plasma levels of AG were significantly decreased (B) but LEAP-2 levels (C) were increased with refeeding. AG/LEAP-2 molar ratio (D) was significantly higher in fasted compared to refed animals. Blood glucose and plasma AG and LEAP-2 levels were assayed in five healthy women after a 15-hours fast and 2 hours after a standard meal. Plasma levels of glucose (E) increased after a meal and AG (F) decreased. LEAP-2 levels increased after the meal in four participants out of five. AG/LEAP-2 molar ratio (H) were significantly higher in fasted compared to post-prandial state in humans. Data are presented as individual values. AG: Acyl-ghrelin. LEAP-2: Liver-expressing Antimicrobial Peptide-2. Statistical analysis: Paired t-test. \*p<0.05, \*\* p<0.01.
